# Supplementary material for: SLIRP Regulates the Rate of Mitochondrial Protein Synthesis and Protects LRPPRC from Degradation
Source: PubMed Central journal article supplement (PMC4527767; doi:10.1371/journal.pgen.1005423), 2015-08-06
Supplement: pgen.1005423.s005.pdf [file pgen.1005423.s005.pdf]

## S1 Table

| <b>Genotyping primers</b>                       |                      |
|-------------------------------------------------|----------------------|
| Slirp WT Fw                                     | TGTATCTGGCAGGACACTGG |
| Slirp WT Rv                                     | ATACTAGGCAAGCGCTCCAC |
| Slirp KO Fw                                     | GAGGAGATGAGCGTACTGGC |
| Slirp KO Rv                                     | CCC TCC CTGTGGGAGAGG |
| <b>Taqman probes for mtDNA quantification</b>   |                      |
| 16S                                             | Mm03975671_s1        |
| Atp6                                            | Mm03649417_g1        |
| 18S                                             | Hs99999901_s1        |
| <b>Taqman probes for mRNA level measurement</b> |                      |
| b2µglobuline                                    | Mm00437762_m1        |
| Slirp                                           | Mm01296845_m1        |
| Lrp6                                            | Mm00511512_m1        |
| 12S                                             | AJBWSP               |
| 16S                                             | Mm03975671_s1        |
| Cox1                                            | Mm04225243_g1        |
| Cox2                                            | Mm03294838_g1        |
| Cox3                                            | Mm04225261_g1        |
| Cytb                                            | Mm04225271_g1        |
| Atp6                                            | Mm03649417_g1        |
| Nd1                                             | Mm04225274_s1        |

|                                                  |                         |
|--------------------------------------------------|-------------------------|
| Nd2                                              | Mm04225288_s1           |
| Nd4                                              | Mm04225294_s1           |
| Nd5                                              | AIHSNT9                 |
| Nd6                                              | AIVI3E8                 |
| <b>Oligonucleotides sequences for MPAT assay</b> |                         |
| Adaptor                                          | ATGTGAGATCATGCACAGTCATA |
| Anti-adaptor                                     | TATGACTGTGCATGATCTCACAT |
| Inner anti-adaptor                               | GACTGTGCATGATCTCACAT    |
| Upper Cytb                                       | ACGCCATTCTACGCTCAATC    |
| Inner Cytb                                       | CCTAATATTCCGCCCAATCA    |
| Upper Nd1                                        | TCCTATGGATCCGAGCATCT    |
| Inner Nd1                                        | GGATCCGAGCATCTTATCCA    |
| Upper Nd2                                        | GAGGCCTTCCACCACTAACA    |
| Inner Nd2                                        | GCCTTCCACCACTAACAGGA    |
| Upper Nd3                                        | TTCGACCCTACAAGCTCTGC    |
| Inner Nd3                                        | CAAGCTCTGCACGTCTACCA    |
| Upper Nd4                                        | CTATAATCATGGCCCGAGGA    |
| Inner Nd4                                        | AACCTCCAACCCTCACACAC    |
| Upper Cox2                                       | CAGTCCCCTCCCTAGGACTT    |
| Inner Cox2                                       | AGGCCGACTAAATCAAGCAA    |
| Upper Cox3                                       | TTACTTCACCATCCTCCAAGC   |
| Inner Cox3                                       | CACCATCCTCCAAGCTTCA     |

|            |                      |
|------------|----------------------|
| Upper Atp6 | ACCAATGGCATTAGCAGTCC |
| Inner Atp6 | TTAGCCCACCAACAGCTACC |
